# Supplementary material for: In depth evaluation of the prognostic and predictive utility of PTEN immunohistochemistry in colorectal carcinomas: performance of three antibodies with emphasis on intracellular and intratumoral heterogeneity
Source: Springer Nature journal article supplement (doi:10.1186/s13000-016-0508-0), 2016-07-08
Supplement: MOESM1 [file 10353556]

|               | Normal mucosa                                                                      | PTEN positive                                                                        | PTEN negative                                                                         |
|---------------|------------------------------------------------------------------------------------|--------------------------------------------------------------------------------------|---------------------------------------------------------------------------------------|
| Dako          | 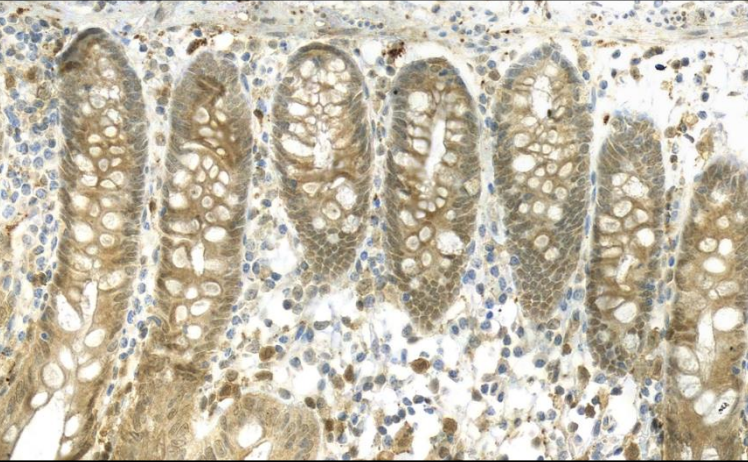    |     |     |
| Neomarker     |   |   |   |
| CellSignaling |  |  |  |
